# Supplementary material for: Indirect exclusion of four candidate genes for generalized progressive retinal atrophy in several breeds of dogs
Source: Springer Nature journal article supplement (doi:10.1186/1477-5751-5-19), 2006-11-29
Supplement: Additional file 2 [file 1477-5751-5-19-s2.doc]

Additional file 2: Primers, conditions for PCR amplification and restriction enzymes used before SSCP analyses.

| PCR-System | Location | Primer sequence (5’3’) | Fragment size (bp) | Annealing temperature/MgCl2 (°C/mM) | Restriction enzyme |
| --- | --- | --- | --- | --- | --- |
| ABCR C 2F | Exon 2 | TTCGCTTTGTGGTGGAACTTG | 135 | 54/2.0 | *-* |
| ABCR C IVS2+R | Intron 2 | CTGGCAATCCTGGAGGTCC |
| ABCR C IVS2-F | Intron 2 | CCAGCAACCAGAAGTGGCA | 257 | 54/1.0 | *HpaII* |
| ABCR C IVS3+R | Intron 3 | TTAGGCTATGGCTTGAACGCA |
| ABCR C IVS5-F | Intron 5 | TCTGTGGGTTAGGACACGGAC | 405 | 53/1.0 | *BshNI* |
| ABCR C IVS6+R | Intron 6 | GGCTCCAAAGACCCAAGGA |
| ABCR H 9F | Exon 9 | TGTAATGCATTGATCCAGAGCC | 437 | 54/1.0 | *BstYI* |
| ABCR C IVS9+R | Intron 9 | GTTCTCTGAATCCTGGCTCCC |
| ABCR C IVS9-F | Intron 9 | AACTCAGGGTTTGTGACAGGA | 202 | 54/1.0 | *-* |
| ABCR H 10R | Exon 10 | CTTTGACAACAGCACACAGATG |
| ABCR H 12F | Exon 12 | TGCTTGGTCCTGGATAAGTTTGAAAG | 240 | 54/3.0 | *NlaIII* |
| ABCR C IVS12+R | Intron 12 | AGGCAATCTTGAAGTCCCTGTGC |
| ABCR C IVS12-F | Intron 12 | TGTGCTTGTGAAGTGCCACTAAACTGT | 250 | 54/1.0 | *NlaIII* |
| ABCR H 13R | Exon 13 | TACCCCTGCTTCGTGGACGATTC |
| ABCR H 21F | Exon 21 | GTGGCTGAGCACATGCTGTTC | 208 | 54/1.0 | *-* |
| ABCR C IVS21+R | Intron 21 | ACACTGGCAGAACGGGAGG |
| ABCR C IVS21-F | Intron 21 | CCCTGGGCCTTTCTCCTC | 203 | 54/2.0 | *BshNI* |

Additional file 2: Continue.

| PCR-System | Location | Primer sequence (5’3’) | Fragment size (bp) | Annealing temperature/MgCl2 (°C/mM) | Restriction enzyme |
| --- | --- | --- | --- | --- | --- |
| ABCR H 22R | Exon 22 | CTGCTCCTGAAGTATCGCTCAG |  |  |  |
| ABCR C 28F | Exon 28 | TTGGCTCTGATGCTTTCCATC | 656 | 54/3.0 | *BfaI* |
| ABCR C 29R | Exon 29 | CCTGAAGGAAGAATGGCTTCC |
| ABCR H 34F | Exon 34 | GCCCTATCACTAGAGAGGCCTCTAAAG | 468 | 54/1.5 | *MvaI* |
| ABCR H 35R | Exon 35 | GGAGCAGCTCTCAGAGATTACAGT |
| ABCR H 39F | Exon 39 | ACGCTGCTCAGGTTCAACG | 161 | 54/1.0 | *-* |
| ABCR C IVS39+R | Intron 39 | CCTGTGGAACATGGCCCTAC |
| ABCR C IVS39-F | Intron 39 | CAGCTGGGCCAAATGTTGTA | 205 | 54/1.0 | *-* |
| ABCR C 40R | Exon 40 | CCACTTCTTCCTCACCCGATG |
| ABCR H 45F | Exon 45 | TGCAAACTGGAGTATTAAGAGCCTG | 555 | 54/1.0 | *AvaII* |
| ABCR C IVS45+R | Intron 45 | CCTTGTGCCCATGCAGTCTG |
| ABCR C IVS45-F | Intron 45 | TTGTACATTGTCTGCCAGAGAGCAG | 381 | 54/3.0 | *AluI* |
| ABCR H 47R | Exon 47 | CTTTCGATGTATGGGCACCATTCA |
| CX36 H 1F | Exon 1 | TGGGGGAATGGACCATCTTG | 239 | 54/1.0 | *HaeIII* |
| CX36 C IVS1+R | Intron 1 | GGTACCCGATGCCCAGTGAT |
| CX36 C IVS1-F | Intron 1 | GGCAGGGAAAGGAGGAGG | 220 | 56/1,0 | *-* |
| CX36 H 2R | Exon 2 | CCTGCTATGACCGCGCC |

Additional file 2: Continue.

| PCR-System | Location | Primer sequence (5’3’) | Fragment size (bp) | Annealing temperature/MgCl2 (°C/mM) | Restriction enzyme |
| --- | --- | --- | --- | --- | --- |
| CX36 C 2F | Exon 2 | GTTTGTGTGCAACACCTGCAG | 442 | 54/0.75 | *MboII* |
| CX36 H 2R1,5 | Exon 2 | AAGGCATCTCCCGCTTCTACA |
| CX36 H 2F | Exon 2 | CCACACCCATCAGGTCTACGC | 441 | 54/1.0 | *HaeIII* |
| CX36 H 2R2 | Exon 2 | GTCCAGTGACTCTGCCTATGTGTG |
| MERTK C IVS-3F | Intron 3 | AACAGTCTCCATTCCCCTTGG | 287 | 57/3.0 | *HincII* |
| MERTK C IVS+4R | Intron 4 | GAAAACAATAAAGAAATCACACAACTCG |
| MERTK C IVS-5F | Intron 5 | ACTGTGTGTGTTCGGTAGCTGTG | 223 | 57/2.0 | *-* |
| MERTK C IVS+6R | Intron 6 | CAGCCACTTCTCTCTTCATCCTG |
| MERTK C IVS-6F | Intron 6 | CCATGTCTGGCATTCCCAC | 276 | 57/2.0 | *Tru1I* |
| MERTK C IVS+7R | Intron 7 | GGCAATATTTATTCTGAACTCCAGG |
| MERTK C IVS-7F | Intron 7 | CCACAGAATGTTCAAAAACCAAAC | 295 | 57/2.0 | *MboI* |
| MERTK C IVS+8R | Intron 8 | CCTAGGAGACCAGTGAACTCCTTC |
| MERTK C IVS-9F | Intron 9 | TCTTTCCCTATTACAAGCCAACATG | 267 | 57/2,0 | *HincII* |
| MERTK C IVS+10R | Intron 10 | AAACATTTGAAGCTGGGACACTTAC |
| RDH12 C 5’UTR | 5' UTR | GCACAAAGAAGCCAGGAGTTG | 231 | 60/1.5 | - |
| RDH12 C IVS1+R | Intron 1 | CTACGCATATCCCAATCCAGG |
| RDH12 C IVS1-F | Intron 1 | GAAATTTCCCTTTGAGGCTGG | 301 | 58/1.5 | *Bsp143II* |

Additional file 2: Continue.

| PCR-System | Location | Primer sequence (5’3’) | Fragment size (bp) | Annealing temperature/MgCl2 (°C/mM) | Restriction enzyme |
| --- | --- | --- | --- | --- | --- |
| RDH12 C IVS2+R | Intron 2 | GGAGGAAAGATAAGGAAATGTGGAC |  |  |  |
| RDH12 C IVS2-F | Intron 2 | GGTTTAGGGATGGCTGGGAG | 332 | 58/1,5 | *HinfI* |
| RDH12 C IVS3+R | Intron 3 | GTGGCACAGGGTGGAACAG |
| RDH12 C IVS3-F | Intron 3 | ACTCAGGCTTGCTACAGGCAG | 352 | 58/1.5 | *NsiI* |
| RDH12 C IVS4+R | Intron 4 | CATCAGGCTTCTTGCAGGG |
| RDH12 C IVS4-F | Intron 4 | GCTTCTACCCCCTGAGCCTG | 307 | 62/1.5 | *Bsp143II* |
| RDH12 C IVS5+R | Intron 5 | GTCTCTACCCTGGCTCTTTCTCC |
| RDH12 C IVS5-F | Intron 5 | CCATTTGTGCATTTTGCTGC | 316 | 56/1.5 | *MboI* |
| RDH12 C IVS6+R | Intron 6 | CAGGTGATGGAGAAAACCAGG |
| RDH12 C IVS6-F | Intron 6 | CAACTTTTCCAGATTGCCACC | 273 | 58/1.5 | *Bsp143II* |
| RDH12 C 3'UTR | 3' UTR | GCCAGCCAGGAGGACAGTC |

The letter ‘C’ after the gene designation in the first column points to canine-specific primer sequences, whereas ‘H’ stands for primers deduced from human DNA sequence.
